# Supplementary material
Source: publisher site journal article supplement (https://www.spandidos-publications.com/7662/downloadSupplementary)

Figure S1. Electropherogram of STR analysis for (A) Wt-HL60 and (B) Res-HL60 cells. STR profiling was performed to confirm the identity and authenticity of the cell lines used in this study. The STR profiles matched the reference data for HL60 (*Cellosaurus* CVCL\_0002) provided by the RIKEN BioResource Center, indicating no evidence of cross-contamination or misidentification. This analysis ensures that downstream experimental results obtained from Res-HL60 cells can be attributed to the intended genetic background. Wt, wild type; Res, resistant; STR, short tandem repeat.

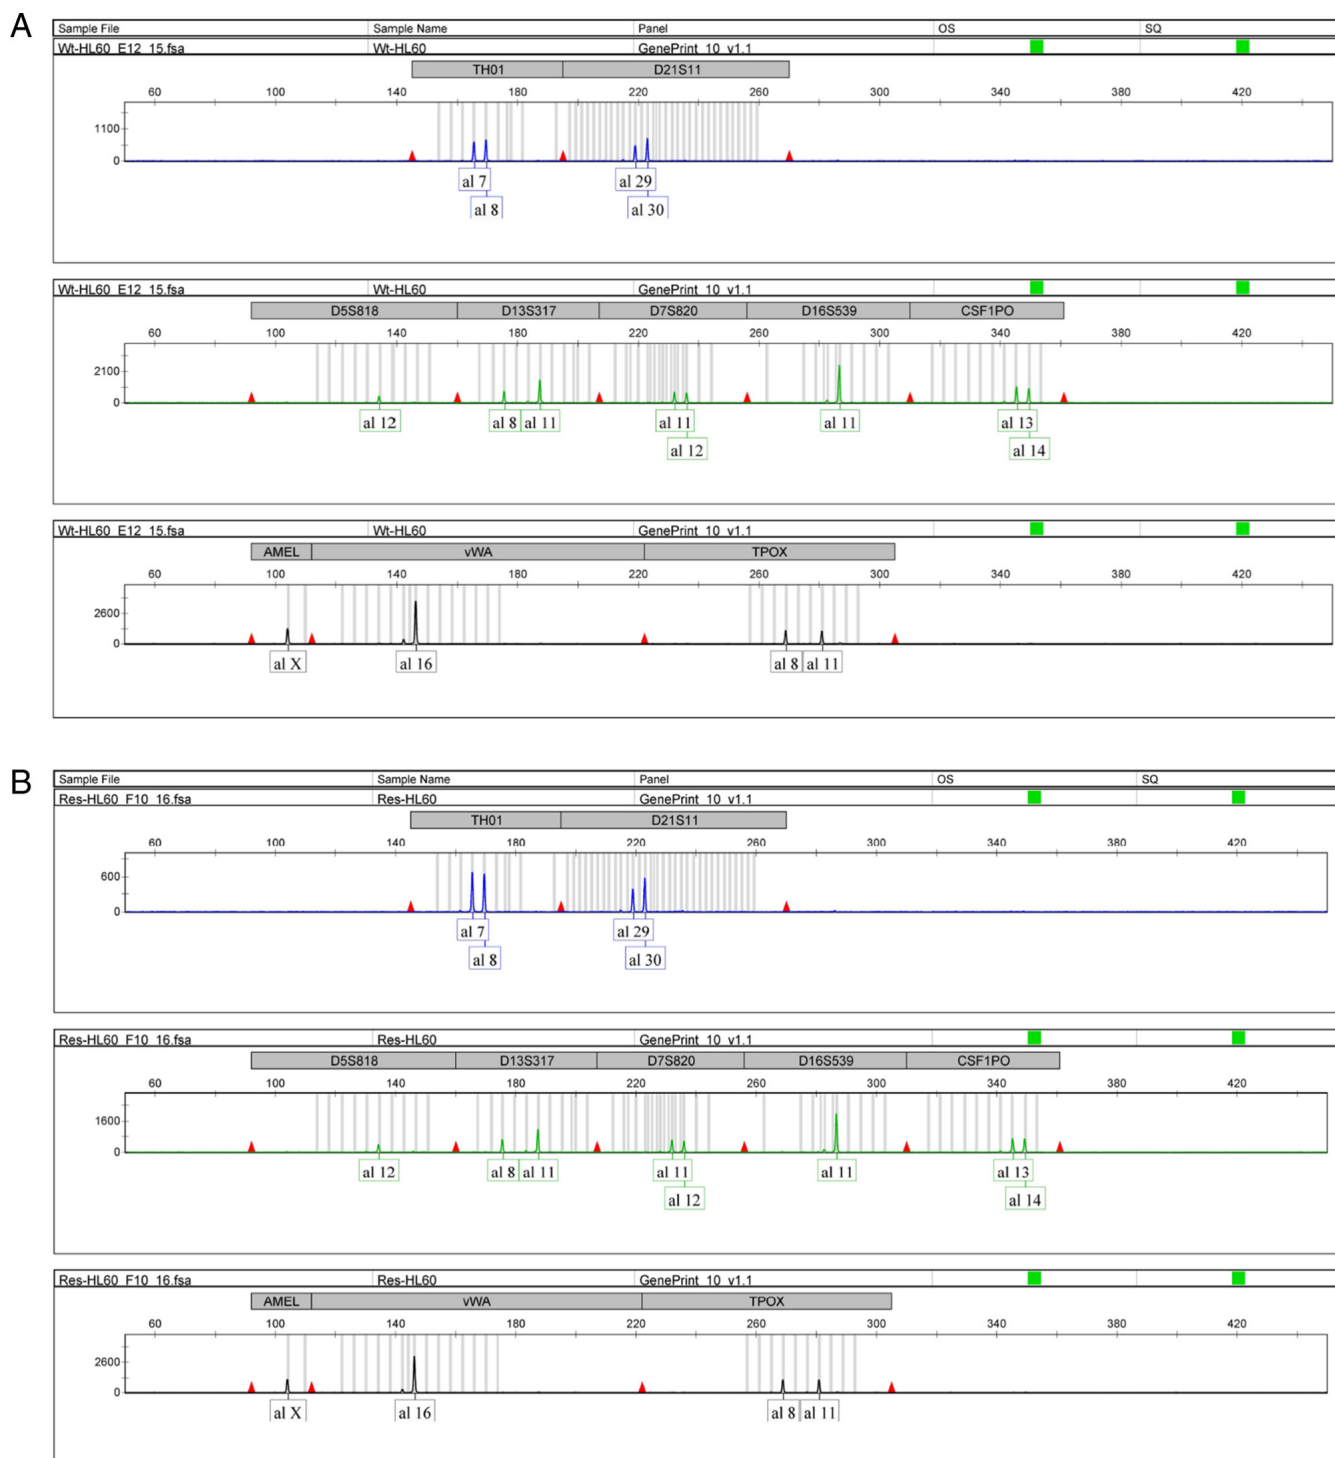

Supplement: Supplementary file 1 [file downloadSupplementary]
